# Supplementary material for: Enhanced surface wettability and innate activity of an iron borate catalyst for efficient oxygen evolution and gas bubble detachment
Source: Royal Society of Chemistry journal article supplement (doi:10.1039/c9ta03346g), 2019-01-01
Supplement: c9ta03346g1.pdf [file c9ta03346g1.pdf]

## Supporting Information

### **Enhanced surface wettability and innate activity of iron borate catalysts for efficient oxygen evolution and gas bubble detachment**

Kamran Dastafkan,<sup>a</sup> Yibing Li,<sup>a</sup> Yachao Zeng,<sup>a</sup> Li Han,<sup>\*b</sup> and Chuan Zhao<sup>\*a</sup>

<sup>a</sup>School of Chemistry, The University of New South Wales, Sydney, New South Wales 2052, Australia

<sup>b</sup>School of Chemical Engineering and Energy, Zhengzhou University, Zhengzhou 450001, China

\* Corresponding author E-mails: [lihan@zzu.edu.cn](mailto:lihan@zzu.edu.cn); [chuan.zhao@unsw.edu.au](mailto:chuan.zhao@unsw.edu.au)

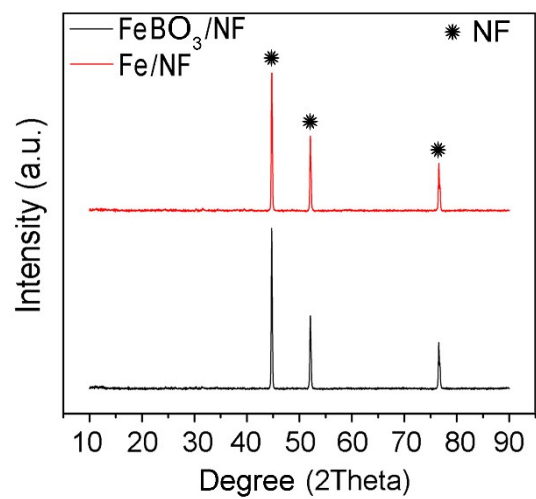

**Fig. S1** Comparison between XRD patterns of FeBO<sub>3</sub>/NF and Fe/NF samples.

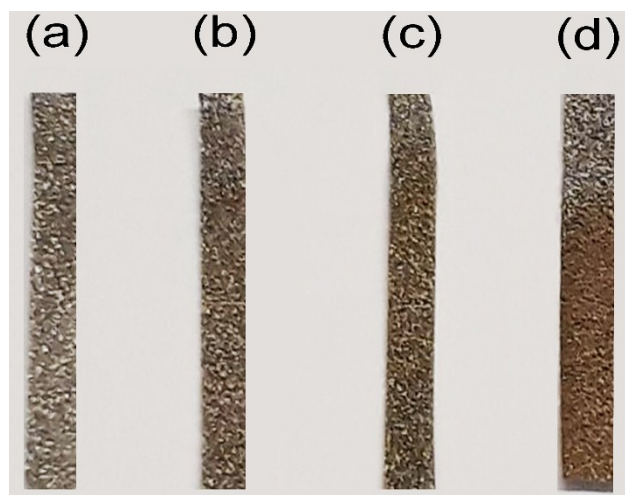

**Fig. S2** Images of the prepared (a) pristine NF, (b)  $\text{Fe}(\text{OH})_3/\text{NF}$ , (c)  $\text{Fe}/\text{NF}$ , and (d)  $\text{FeBO}_3/\text{NF}$  electrodes.

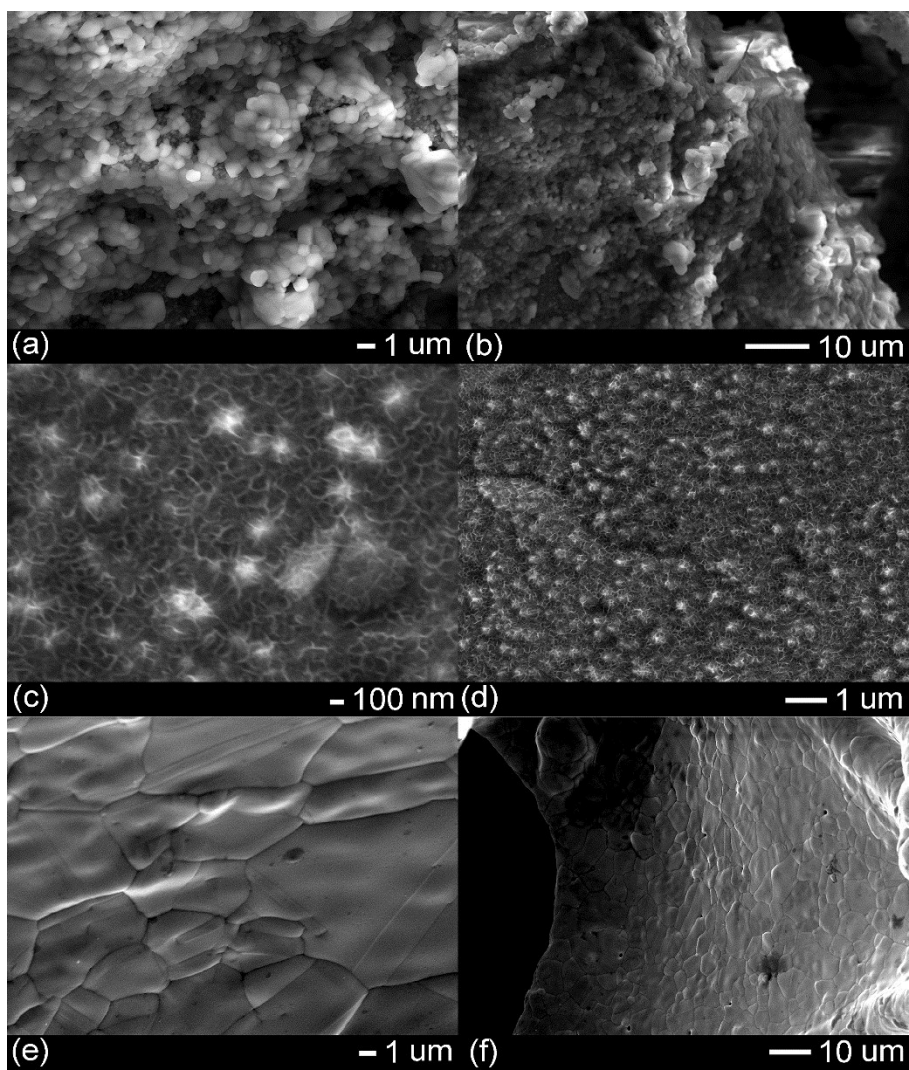

**Fig. S3** SEM images of (a) and (b) Fe/NF, (c) and (d) Fe(OH)<sub>3</sub>/NF, and (e) and (f) pristine NF.

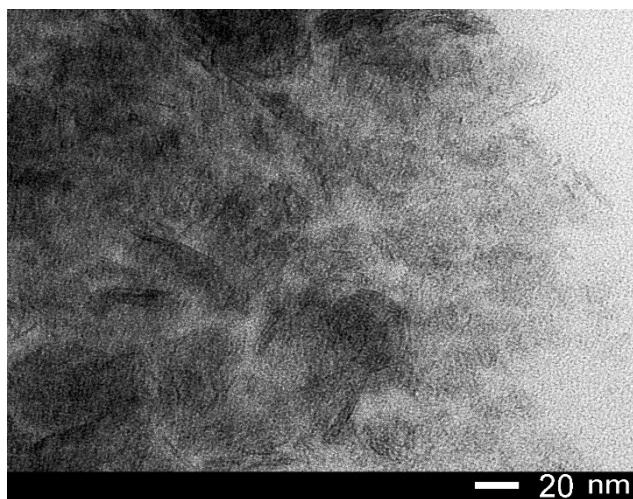

**Fig. S4** TEM image of the as-prepared FeBO<sub>3</sub>.

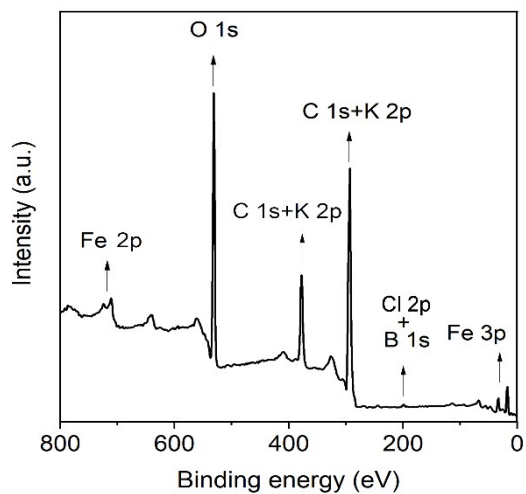

**Fig. S5** XPS spectra overall survey of FeBO<sub>3</sub>/NF.

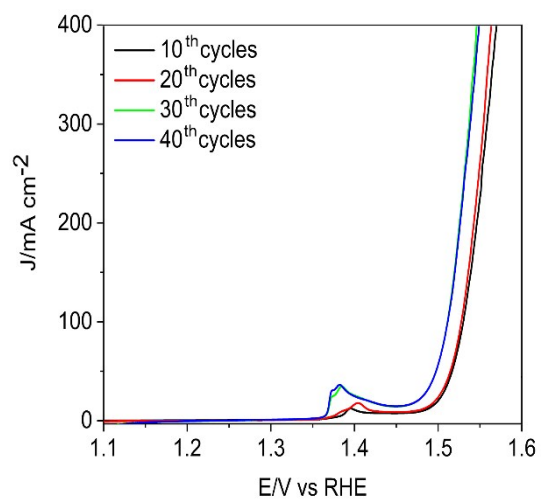

**Fig. S6** Optimization for the number of dip-coating cycles to prepare FeBO<sub>3</sub>/NF.

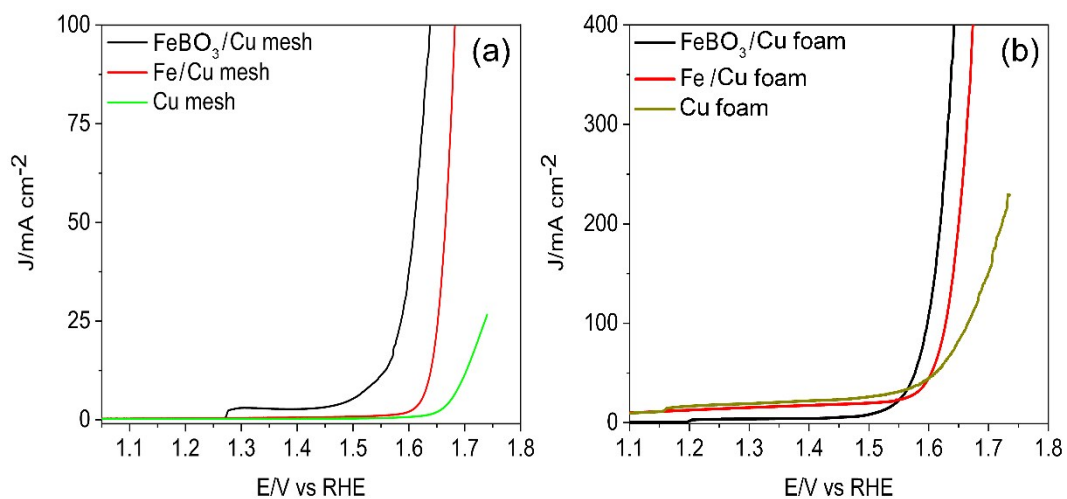

**Fig. S7** OER polarization curves performed on (a) copper mesh and (b) copper foam as substrate at an iR correction level of 90%, scan rate of 5 mV s<sup>-1</sup>, and in 1.0 M KOH.



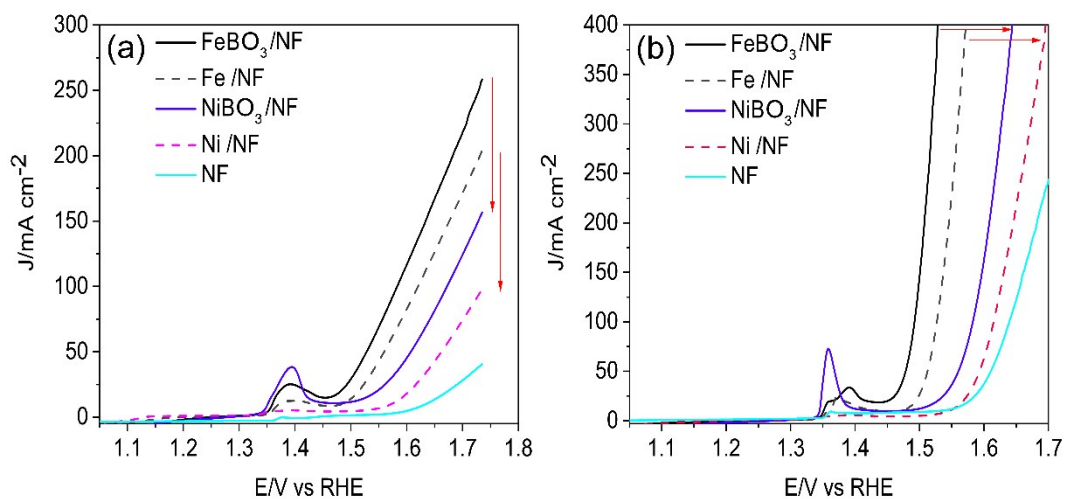

**Fig. S8** Comparison of the OER polarization curves of FeBO<sub>3</sub>/NF, Fe/NF, NiBO<sub>3</sub>/NF, Ni/NF, and pristine NF samples (a) without and (b) with 90%  $iR$  compensation level, scan rate of 5  $\text{mV s}^{-1}$ , and in 1.0 M KOH.

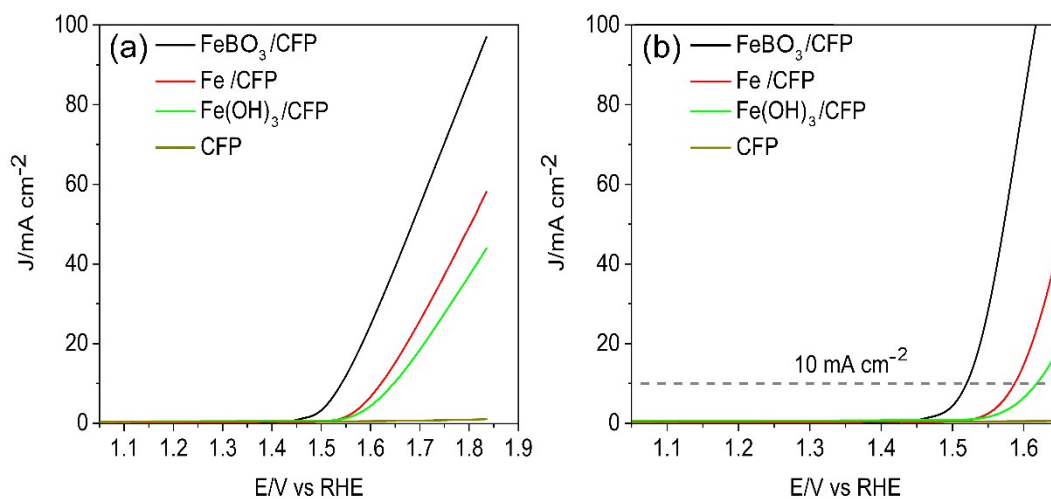

**Fig. S9** Comparison of the OER polarization curves of scraped  $\text{FeBO}_3$ , Fe,  $\text{Fe}(\text{OH})_3$  off the NF and loaded on inert CFP substrate (a) without and (b) with 90%  $iR$  compensation level, scan rate of  $5 \text{ mV s}^{-1}$ , and in 1.0 M KOH.

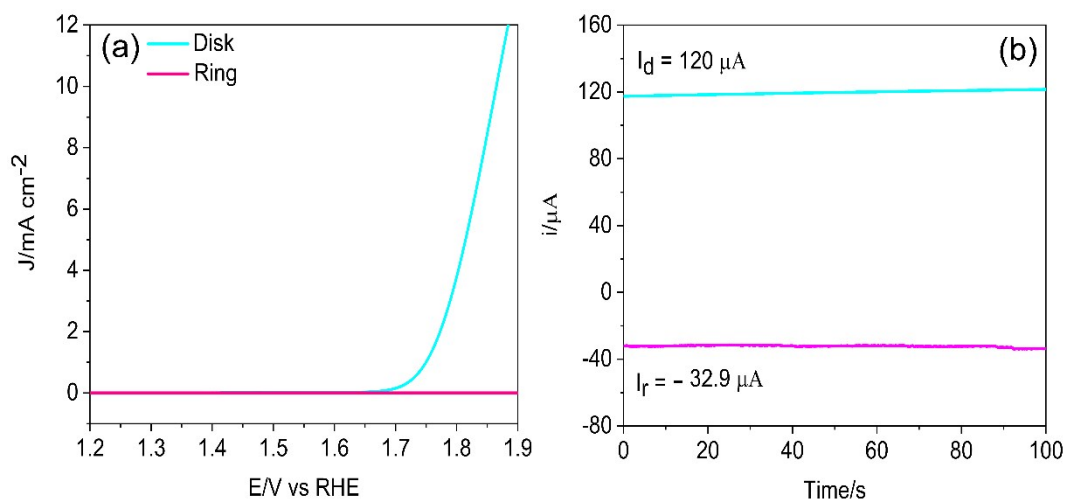

**Fig. S10** (a) RRDE voltammogram for FeBO<sub>3</sub> ink loaded on RRDE (1600 rpm) in an O<sub>2</sub>-saturated 1.0 M KOH electrolyte with an applied potential of 1.5 V (vs RHE) at the ring electrode. (b) Comparison of disk and ring current responses obtained for FeBO<sub>3</sub> ink loaded on RRDE (1600 rpm) in an N<sub>2</sub>-saturated 1.0 M KOH electrolyte, with an applied potential of 0.4 V (vs RHE) at the ring and a constant current of 120 μA at the disk.

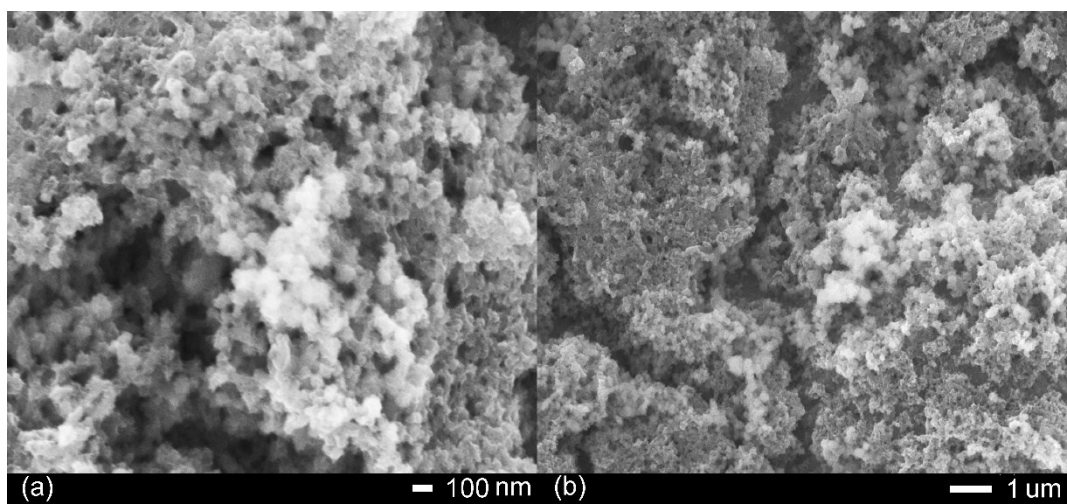

**Fig. S11** (a) and (b) Post-OER SEM images of FeBO<sub>3</sub>/NF.

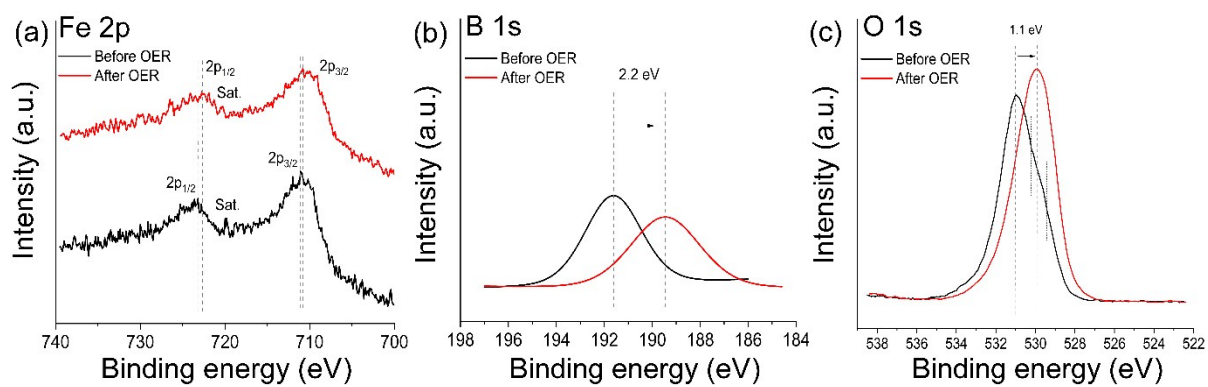

**Fig. S12** Comparison of XPS profiles; (a) Fe 2p, (b) B 1s, and (c) O 1s high resolution spectra of FeBO<sub>3</sub>/NF before and after OER.

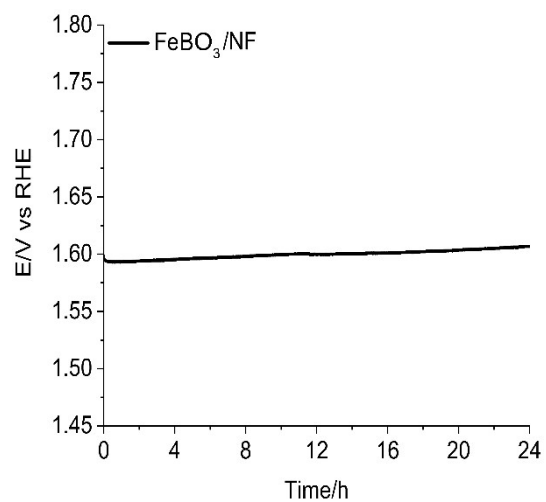

**Fig. S13** Long-term stability test of FeBO<sub>3</sub>/NF at a constant current density of 100 mA cm<sup>-2</sup>.

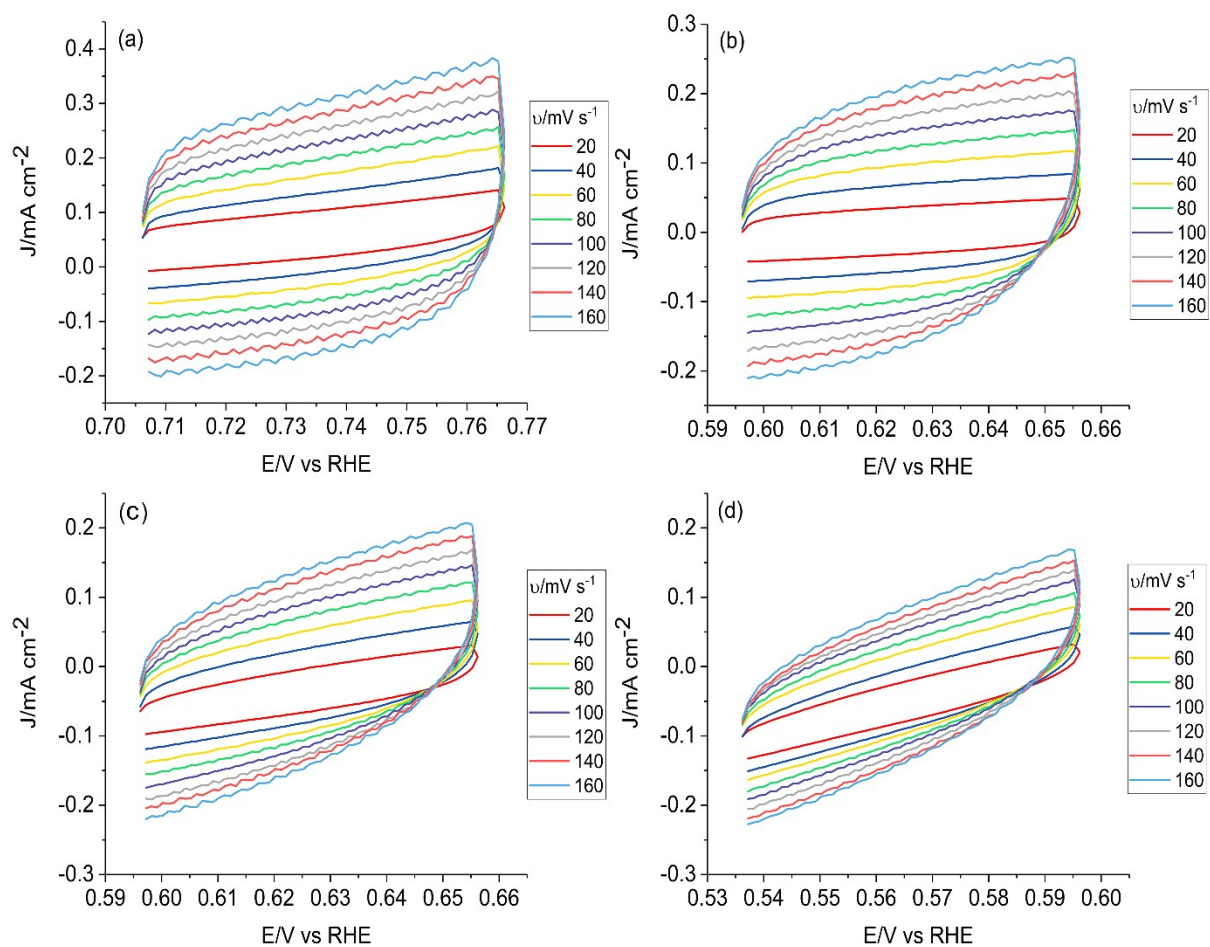

**Fig. S14** Double-layer capacitance measurements of (a)  $\text{FeBO}_3/\text{NF}$ , (b)  $\text{Fe}/\text{NF}$ , (c)  $\text{Fe}(\text{OH})_3/\text{NF}$ , and (d) pristine NF.

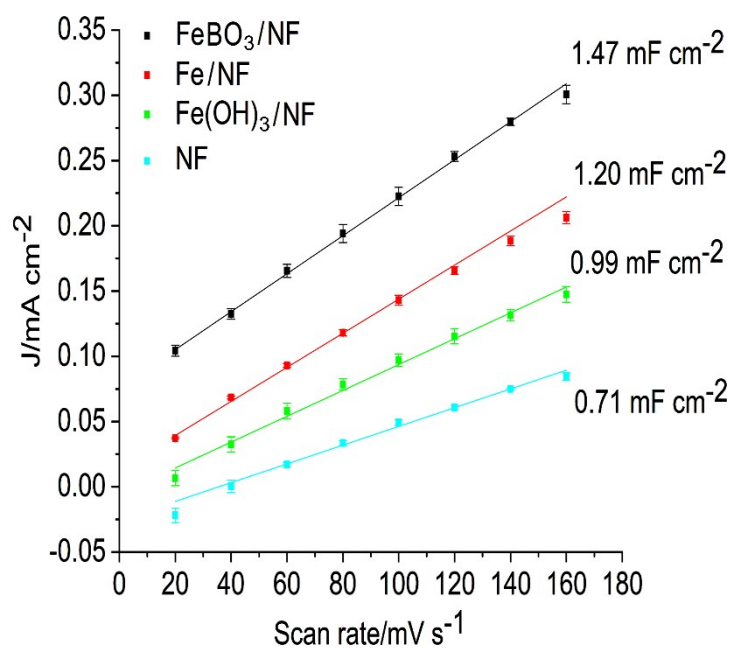

**Fig. S15** Charging current density differences plotted against scan rates. The linear slopes were calculated based on the average value of three different measurements along with the standard deviation. The derived anodic slope was then considered equivalent to the double-layer capacitance,  $C_{DL}$ , and used to represent the ECSA.



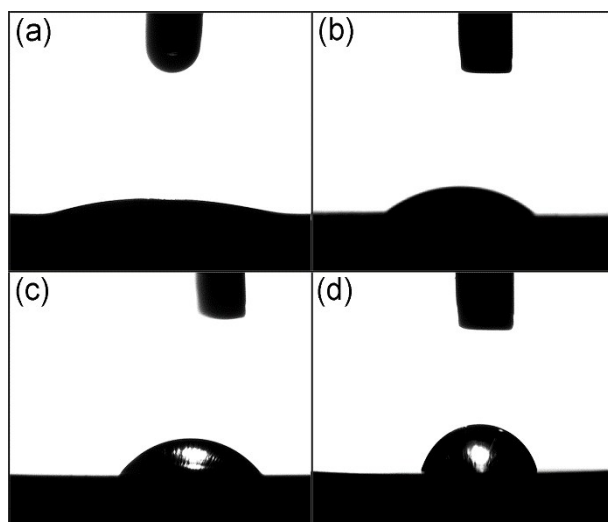

**Fig. S16** Water droplet contact angle measurements on nickel foil deposited with (a)  $\text{FeBO}_3$ , (b) Fe, (c)  $\text{Fe(OH)}_3$ , respectively and (d) pristine nickel foil.

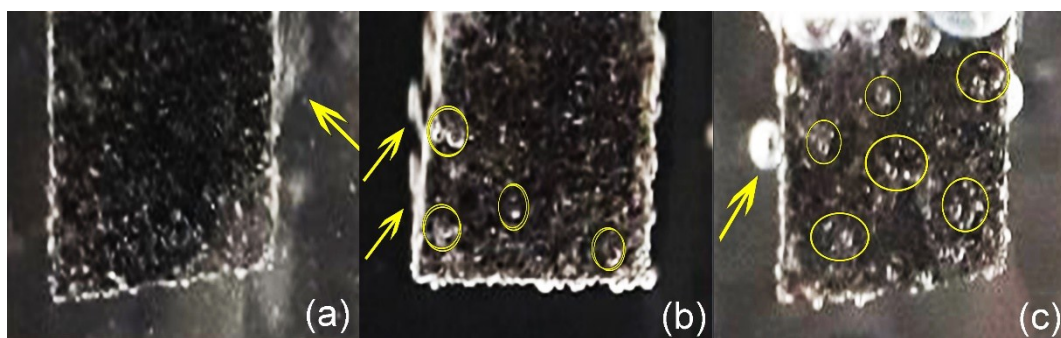

**Fig. S17** Digital images of electrodes during a steady-state OER process upon applying 360 mV overpotential, (a)  $\text{FeBO}_3/\text{NF}$ , (b)  $\text{Fe}/\text{NF}$ , (c)  $\text{Fe}(\text{OH})_3/\text{NF}$ .

**Table S1** Comparison of OER behaviour of FeBO<sub>3</sub>/NF electrode with those of state-of-the-art electrocatalysts at alkaline medium

| Electrode                                                                | KOH Electrolyte concentration (M) | Overpotential@ 10 mA cm <sup>-2</sup> (mV) | Tafel slope (mV dec <sup>-1</sup> ) | Reference |
|--------------------------------------------------------------------------|-----------------------------------|--------------------------------------------|-------------------------------------|-----------|
| FeBO <sub>3</sub> /NF                                                    | 1.0                               | 232 <sup>a</sup>                           | 46.3                                | This work |
| FePO <sub>4</sub> /NF                                                    | 1.0                               | 215                                        | 28.0                                | S1        |
| Ni <sub>0.9</sub> Fe <sub>0.1</sub> O <sub>x</sub> /ITO <sup>b</sup>     | 1.0                               | 336                                        | 30.0                                | S2        |
| P-NiFe/NF                                                                | 1.0                               | 205                                        | 32.0                                | S3        |
| NiFe LDH-NS-DG10/GC                                                      | 1.0                               | 210                                        | 52.0                                | S4        |
| Ni:PO <sub>4</sub> -Fe/NF                                                | 1.0                               | 220                                        | 37.0                                | S5        |
| NiFeO <sub>x</sub> /IF                                                   | 1.0                               | 220                                        | 34.0                                | S6        |
| NiFe LDH/NF                                                              | 1.0                               | 215                                        | 28.0                                | S7        |
| NiFe LDH/NF                                                              | 1.0                               | 240                                        | NA                                  | S8        |
| NiFe LDH/CNT                                                             | 1.0                               | 240                                        | 31.0                                | S9        |
| α-Ni(OH) <sub>2</sub> /GCDE <sup>c</sup>                                 | 0.1                               | 331                                        | 42.0                                | S10       |
| Ni <sub>0.53</sub> Fe <sub>0.47</sub> O <sub>x</sub> /ITO                | 1.0                               | 310                                        | 28.0                                | S11       |
| NiO <sub>0.71</sub> Fe <sub>0.29</sub> (OH) <sub>x</sub> /G <sup>d</sup> | 0.1                               | 296                                        | 58.0                                | S12       |
| NiFe/NF                                                                  | 1.0                               | 276 <sup>e</sup>                           | 50.1                                | S13       |
| NiSe/NF                                                                  | 1.0                               | 270 <sup>f</sup>                           | 64.0                                | S14       |
| Ni-P/GCDE                                                                | 1.0                               | 300                                        | 64.0                                | S15       |
| Ni <sub>2</sub> P/GC                                                     | 1.0                               | 290                                        | 47.0                                | S16       |
| NiFe-OH-PO <sub>4</sub> /NF                                              | 1.0                               | 249 <sup>g</sup>                           | 41.8                                | S17       |
| Ni <sub>3</sub> S <sub>2</sub> /NF                                       | 1.0                               | 260                                        | NA                                  | S18       |
| NiBO <sub>3</sub> -NB/GCDE                                               | 1.0                               | 302                                        | 52.0                                | S19       |
| NiCo <sub>2</sub> O <sub>4</sub> -NiCoBO <sub>3</sub> /CC <sup>h</sup>   | 1.0                               | 270                                        | 62.0                                | S20       |

<sup>a,f,g</sup>Overpotential at 20 mA cm<sup>-2</sup>

<sup>b</sup>ITO-coated glass electrode

<sup>c</sup>Glassy carbon disk electrode

<sup>d</sup>Graphite electrode

<sup>e</sup>Overpotential at 50 mA cm<sup>-2</sup>

<sup>h</sup>Carbon cloth electrode

**Table S2** Simulated  $R_s$  and  $R_{ct}$  values for the electrocatalysts in this work via EIS spectra using the applied equivalent circuit

| Sample                  | $R_s$ ( $\Omega$ ) | $R_Q$ ( $\Omega$ ) | $R_{ct}$ ( $\Omega$ ) |
|-------------------------|--------------------|--------------------|-----------------------|
| FeBO <sub>3</sub> /NF   | 3.043              | 0.042              | 1.062                 |
| Fe/NF                   | 3.218              | 0.011              | 2.141                 |
| Fe(OH) <sub>3</sub> /NF | 3.556              | 0.012              | 2.716                 |
| RuO <sub>2</sub> /NF    | 2.987              | 0.085              | 13.610                |
| NF                      | 3.642              | 0.040              | 18.960                |

## References

- S1 D. Zhong, L. Liu, D. Li, C. Wei, Q. Wang, G. Hao, Q. Zhao and J. Li, *J. Mater. Chem. A*, 2017, 5, 18627–18633.
- S2 L. Trotochaud, J. K. Ranney, K. N. Williams and S. W. Boettcher, *J. Am. Chem. Soc.*, 2012, 134, 17253–17261.
- S3 F. S. Zhang, J. W. Wang, J. Luo, R. R. Liu, Z. M. Zhang, C. T. He and T. B. Lu, *Chem. Sci.*, 2018, 9, 1375–1384.
- S4 Y. Jia, L. Zhang, G. Gao, H. Chen, B. Wang, J. Zhou, M. T. Soo, M. Hong, X. Yan, G. Qian, J. Zou, A. Du, X. Yao, *Adv. Mater.*, 2017, 29, 1700017.
- S5 Y. Li and C. Zhao, *Chem. Mater.*, 2016, 28, 5659–5666.
- S6 J. Wang, L. Ji, S. Zuo and Z. Chen, *Adv. Energy Mater.*, 2017, 7, 1700107.
- S7 X. Lu and C. Zhao, *Nat. Commun.*, 2015, 6, 6616.
- S8 J. Luo, J. H. Im, M. T. Mayer, M. Schreier, M. K. Nazeeruddin, N. G. Park, S. D. Tilley, H. J. Fan and M. Grätzel, *Science*, 2014, 345, 1593-1566.
- S9 M. Gong, Y. Li, H. Wang, Y. Liang, J. Z. Wu, J. Zhou, J. Wang, T. Regier, F. Wei and H. Dai, *J. Am. Chem. Soc.*, 2013, 135, 8452-8455.
- S10 M. Gao, W. Sheng, Z. Zhuang, Q. Fang, S. Gu, J. Jiang and Yushan Yan, *J. Am. Chem. Soc.*, 2014, 136, 7077–7084.
- S11 J. Wang, L. L. Ji and Z. Chen, *ACS Catal.*, 2016, 6, 6987–6992.
- S12 Y. Q. Gao, X. Y. Liu and G. W. Yang, *Nanoscale*, 2016, 8, 5015–5023.
- S13 D. Guo, J. Qi, W. Zhang and R. Cao, *ChemSusChem.*, 2017, 10, 394–400.
- S14 C. Tang, N. Cheng, Z. Pu, W. Xing and X. Sun, *Angew. Chem. Int. Ed. Engl.*, 2015, 54, 9351–9355.
- S15 X. Y. Yu, Y. Feng, B. Guan, X. W. Lou and U. Paik, *Energy Environ. Sci.*, 2016, 9, 1246–1250.
- S16 L.A. Stern, L. Feng, F. Song and X. Hu, *Energy Environ. Sci.*, 2015, 8, 2347–2351.
- S17 Z. Lei, J. Bai, Y. Li, Z. Wang and C. Zhao, *ACS Appl. Mater. Interfaces*, 2017, 9, 35837–35846.
- S18 L. L. Feng, G. Yu, Y. Wu, G. D. Li, H. Li, Y. Sun, T. Asefa, W. Chen and X. Zou, *J. Am. Chem. Soc.*, 2015, 137, 14023–14026.
- S19 W. J. Jiang, S. Niu, T. Tang, Q. H. Zhang, X. Z. Liu, Y. Zhang, Y. Y. Chen, J. H. Li, L. Gu, L. J. Wan and J. S. Hu, *Angew. Chem. Int. Ed.*, 2017, 56, 6572–6577.
- S20 X. Ji, X. Ren, S. Hao, F. Xie, F. Qu, G. Du, A. M. Asiri and X. Sun, *Inorg. Chem. Front.*, 2017, 4, 1546–1550.
